# Supplementary material for: Bacillus anthracis genomic DNA enhances lethal toxin–induced cytotoxicity through TNF-α production
Source: PubMed Central journal article supplement (PMC4267052; doi:10.1186/s12866-014-0300-9), 2014-12-04
Supplement: 12866_2014_300_MOESM1_ESM.pdf [file 12866_2014_300_MOESM1_ESM.pdf]

## Additional file 1 : Supplementary Figure 1

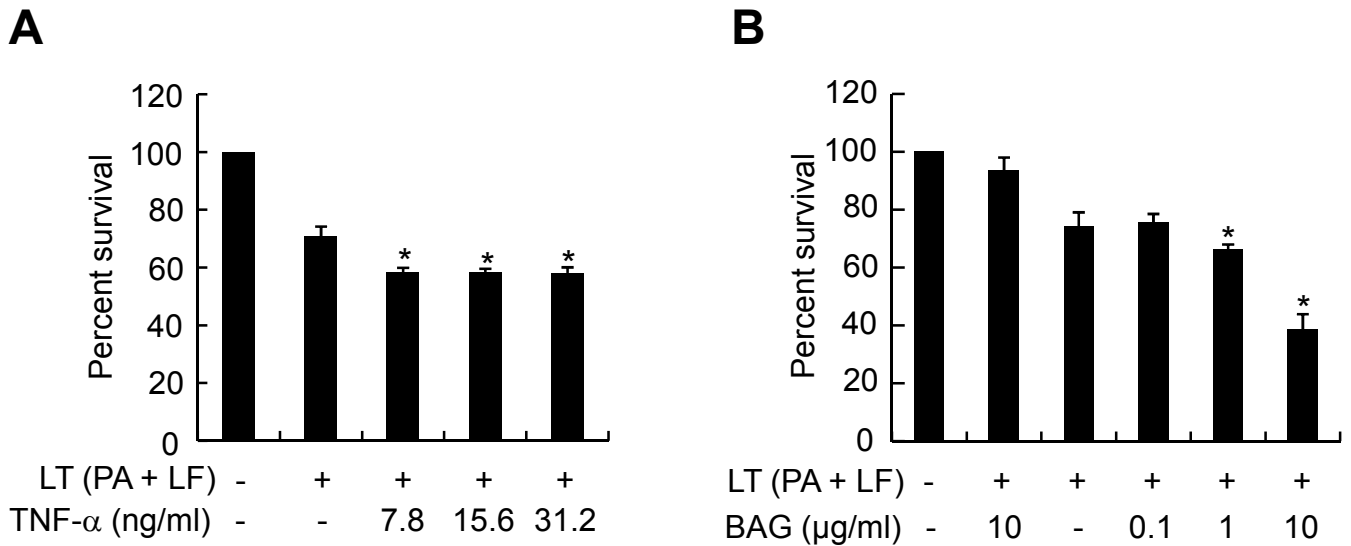

### Supplementary Figure 1. Pretreatment of low concentrations of TNF- $\alpha$ and BAG

**enhances LT-mediated cytotoxicity.** (A) J774A.1 cells were pre-treated with 0, 7.8, 15.6, or 31.2 ng/ml TNF- $\alpha$  for 24 h, and then LT (0.1  $\mu$ g/ml PA + 0.1  $\mu$ g/ml LF) was added. (B) J774A.1 cells were pre-treated with 0, 0.1, 1, or 10  $\mu$ g/ml BAG for 24 h, and then LT (0.1  $\mu$ g/ml PA + 0.1  $\mu$ g/ml LF) was added. After the 4-h incubation with LT, cell viability was determined using MTT assay. The y axis represents the percent survival relative to control values and is given as the mean  $\pm$  SD derived from three separate experiments. \* P < 0.05 as compared with the untreated control group.
